# Supplementary material for: A strategy to construct a highly active CoxP/SrTiO3(Al) catalyst to boost the photocatalytic overall water splitting reactions
Source: Royal Society of Chemistry journal article supplement (doi:10.1039/d1nr07398b), 2022-01-01
Supplement: d1nr07398b1.pdf [file d1nr07398b1.pdf]

## **Noble-Metal-Free Cobalt Phosphide to Boost the Photocatalytic**

### **Overall Water Splitting Activity of SrTiO<sub>3</sub>(Al)**

Shangchun Lv<sup>a</sup>, Mengxi Pei<sup>a</sup>, Yuxiang Liu<sup>a,b</sup>, Zhichun Si<sup>a,\*</sup>, Xiaodong Wu<sup>b,\*</sup>, Rui Ran<sup>b</sup>, Duan Weng<sup>a,b</sup>  
Feiyu Kang<sup>a,b,\*</sup>

<sup>a</sup> International Graduate School at Shenzhen, Tsinghua University, Shenzhen City,  
518055, China

<sup>b</sup> The Key Laboratory of Advanced Materials of Ministry of Education, School of  
Materials Science and Engineering, Tsinghua University, Beijing City, 100084, China

\* Corresponding Authors: [si.zhichun@sz.tsinghua.edu.cn](mailto:si.zhichun@sz.tsinghua.edu.cn);  
[wuxiaodong@tsinghua.edu.cn](mailto:wuxiaodong@tsinghua.edu.cn);  
[fykang@sz.tsinghua.edu.cn](mailto:fykang@sz.tsinghua.edu.cn)

## Results

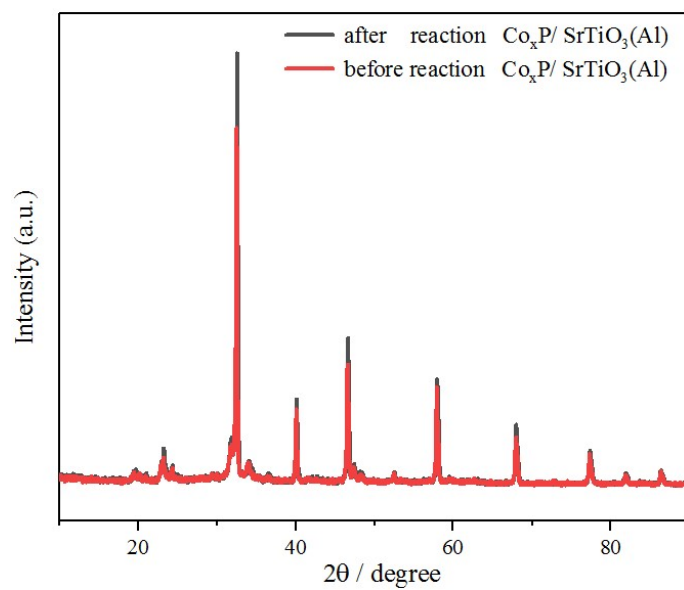

Fig. S1 XRD patterns of pristine (red) and used (black) catalysts

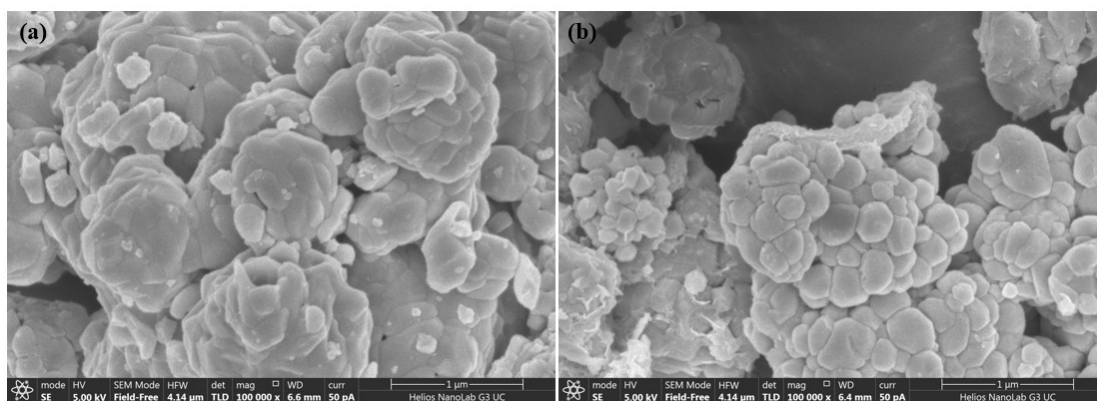

Fig. S2 SEM image of (a) $\text{SrTiO}_3(\text{Al})$  and (b) $\text{Co}_x\text{P}/\text{SrTiO}_3(\text{Al})$

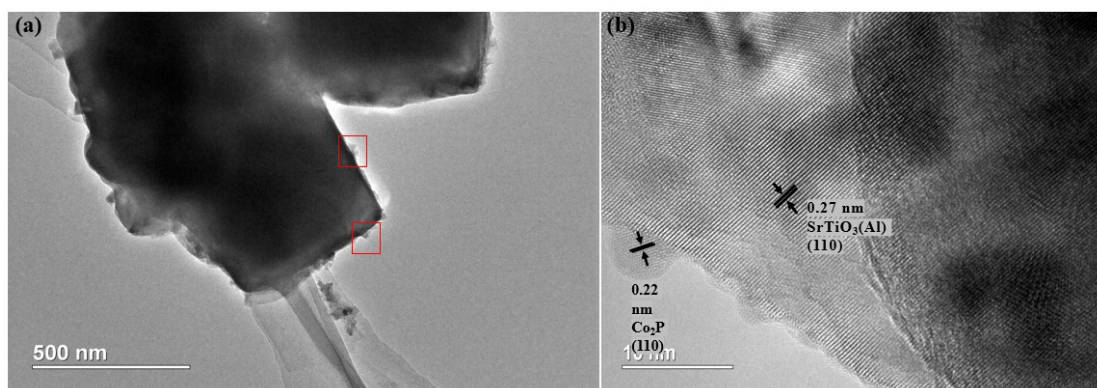

**Fig. S3** TEM image of  $\text{Co}_x\text{P}/\text{SrTiO}_3(\text{Al})$  after four times reaction

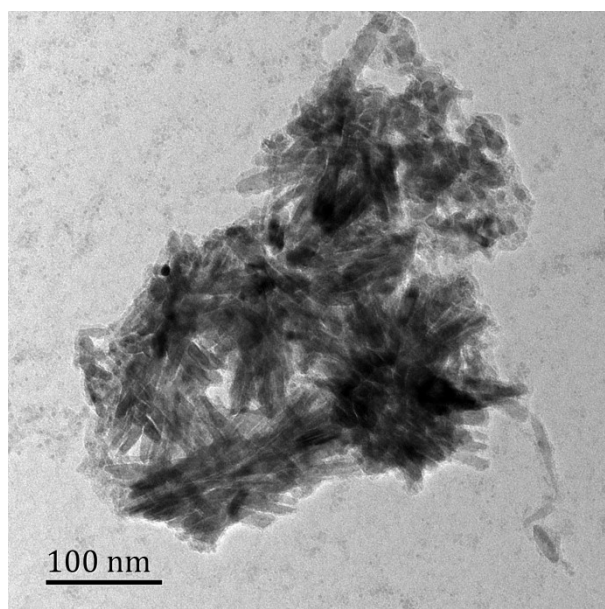

**Fig. S4** TEM image of  $\text{Co}_x\text{P}$  nanobelts

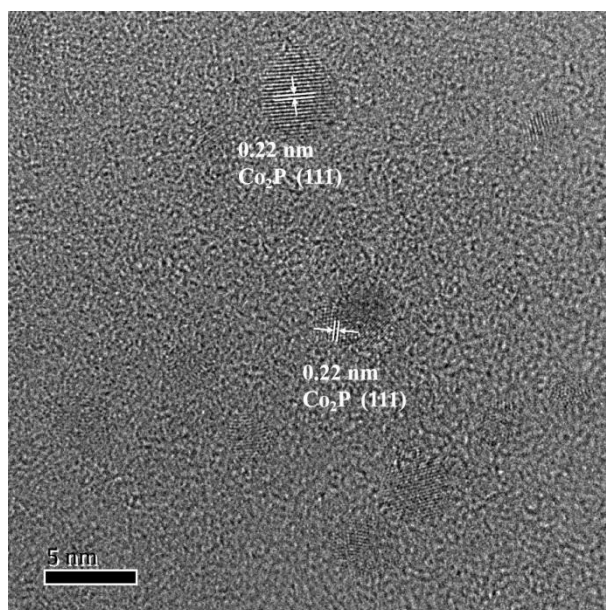

**Fig. S5** HRTEM image of  $\text{Co}_x\text{P}$  nanoparticles

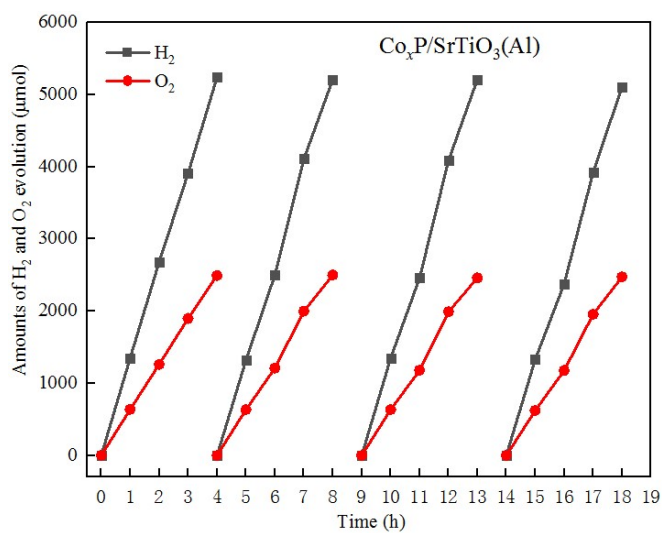

**Fig. S6** Time course and stability of  $\text{Co}_x\text{P}/\text{SrTiO}_3(\text{Al})$

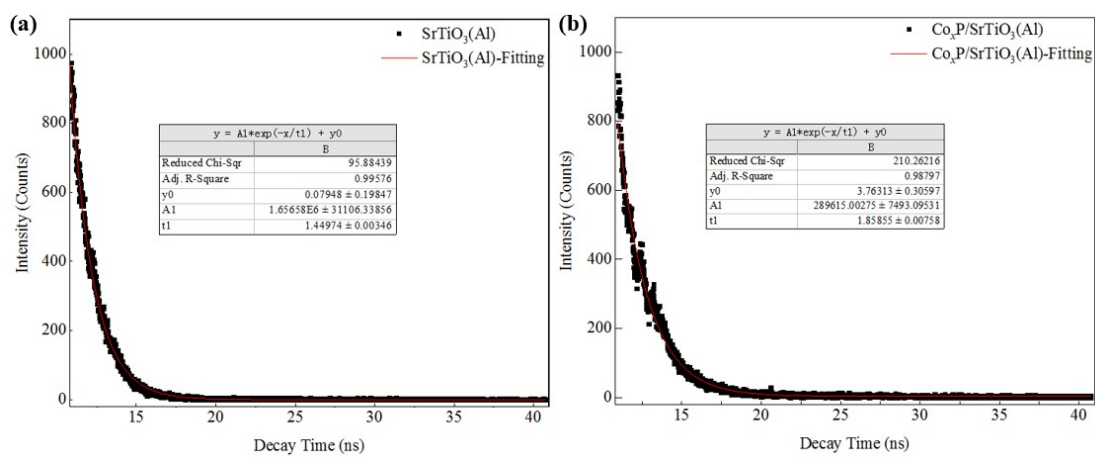

**Fig. S7** TRPL spectra of (a) SrTiO<sub>3</sub>(Al) and (b) Co<sub>x</sub>P/SrTiO<sub>3</sub>(Al) fitting by single exponential functions

**Table 1** Various SrTiO<sub>3</sub>-based composites for photocatalytic overall water splitting.

| Photocatalysts                                                             | Light source                               | H <sub>2</sub> evolution rate (μmol·g <sup>-1</sup> ·h <sup>-1</sup> ) | O <sub>2</sub> evolution rate (μmol·g <sup>-1</sup> ·h <sup>-1</sup> ) | Ref.      |
|----------------------------------------------------------------------------|--------------------------------------------|------------------------------------------------------------------------|------------------------------------------------------------------------|-----------|
| Co <sub>x</sub> P/SrTiO <sub>3</sub> (Al)                                  | 280 W Xe lamp, full arc                    | 1360                                                                   | 638                                                                    | This work |
| Ni SA-NG/SrTiO <sub>3</sub> (Al)/CoO <sub>x</sub>                          | 280 W Xe lamp, full arc                    | 498                                                                    | 250                                                                    | [1]       |
| Ni SA-NG/SrTiO <sub>3</sub> (Al)/CoO <sub>x</sub>                          | 280 W Xe lamp, full arc                    | 498                                                                    | 250                                                                    | [2]       |
| Ni@NiO <sub>x</sub> -SrTiO <sub>3</sub>                                    | 1.5 AM solar simulator                     | 18                                                                     | 7.2                                                                    | [3]       |
| Rh/Cr <sub>2</sub> O <sub>3</sub> -SrTiO <sub>3</sub> :Al-CoO <sub>x</sub> | 300 W Xe lamp, full arc                    | 4 mmol/h                                                               | 2 mmol/h                                                               | [4]       |
| Rh <sub>2-y</sub> Cr <sub>y</sub> O <sub>3</sub> -SrTiO <sub>3</sub> :Al   | Xe lamp, 240 mW/cm <sup>2</sup> , full arc | 530                                                                    | 265                                                                    | [5]       |

**Table 2** Energy structure parameters of SrTiO<sub>3</sub>(Al) and Co<sub>x</sub>P<sup>a</sup>

| Samples                 | $E_{SC}$ (eV) | $E_{HOMO}$ (eV) | Ion potential (eV) | VBM (V vs. SHE) | CBM (V vs. SHE) |
|-------------------------|---------------|-----------------|--------------------|-----------------|-----------------|
| SrTiO <sub>3</sub> (Al) | 17.75         | 3.93            | 7.7                | 2.96            | -0.3            |
| Co <sub>x</sub> P       | -             | -               | -                  | -               | -0.26           |

<sup>a</sup>: The  $E_{SC}$ ,  $E_{HOMO}$ , ion potential and VBM values are determined by UPS spectra. The CBM values are determined by Mott-Schottky plots.

## References

- [32] Yuxiang Liu , Xuejun Xu, Sufan Zheng, Shangchun Lv , et al. Ni Single Atoms Anchored on Nitrogen-Doped Graphene as H<sub>2</sub>-Evolution Cocatalyst of SrTiO<sub>3</sub> (Al)/CoO<sub>x</sub> for Photocatalytic Overall Water Splitting[J]. Carbon, 2021: 763-773.
- [33] Yuxiang Liu , Xuejun Xu, Shangchun Lv, Hewen Li, Zhichun Si, Xiaodong Wu, Rui Ran, Duan Weng. Nitrogen doped graphene quantum dots as a cocatalyst of SrTiO<sub>3</sub>(Al)/CoO<sub>x</sub> for photocatalytic overall water splitting[J]. Catalysis Science & Technology, 2021, 11: 3039-3046.
- [34] Kai H , Kreuger T , Mei B , et al. Transient Behavior of Ni@NiO<sub>x</sub> Functionalized SrTiO<sub>3</sub> in Overall Water Splitting[J]. Acs Catalysis, 2017, 7(3): 1610-1614.
- [35] Yoshinaga T, Saruyama M , Xiong A , et al. Boosting Photocatalytic Overall Water Splitting by Co doping into Mn<sub>3</sub>O<sub>4</sub> Nanoparticles as Oxygen Evolution Cocatalyst[J]. Nanoscale, 2018, 10(22): 10420-10427.
- [36] Jj A, Kk B, Hf A, et al. Investigation on the highly active SrTiO<sub>3</sub> photocatalyst toward overall H<sub>2</sub>O splitting by doping Naion[J]. Journal of Catalysis, 2020, 390: 81-89.
